# Supplementary material for: The Impact of Plant Enemies Shows a Phylogenetic Signal
Source: PubMed Central journal article supplement (PMC4404352; doi:10.1371/journal.pone.0123758), 2015-04-20
Supplement: pone.0123758.s003.pdf [file pone.0123758.s003.pdf]

**Table S1. Description of publications and study units from which data were used for phylogenetic analysis and meta-analysis.**

| Enemy                           | Type            | Study Unit: Measured effect              | Hosts | Publication |
|---------------------------------|-----------------|------------------------------------------|-------|-------------|
| <i>Bipolaris</i> Mv isolate BP1 | Fungal pathogen | 4a: foliar lesion size                   | 13    | [1]         |
| <i>Bipolaris</i> Mv isolate BP2 | Fungal pathogen | 4b: foliar lesion size                   | 13    | [1]         |
| <i>Bipolaris</i> Mv isolate BP3 | Fungal pathogen | 4c: foliar lesion size                   | 13    | [1]         |
| <i>Bipolaris</i> Mv isolate BP4 | Fungal pathogen | 4d: foliar lesion size                   | 13    | [1]         |
| <i>Colias philodice</i>         | Caterpillar     | 9a: pupal weight                         | 6     | [2]         |
| <i>Colias philodice</i>         | Caterpillar     | 9b: pupal development time               | 6     | [2]         |
| <i>Trichoplusia ni</i>          | Caterpillar     | 12a: % larvae trenching, intact leaves   | 13    | [3]         |
| <i>Trichoplusia ni</i>          | Caterpillar     | 12b: % larvae trenching, detached leaves | 13    | [3]         |
| <i>Spodoptera ornithogalli</i>  | Caterpillar     | 12c: larval mass gain, detached leaves   | 13    | [3]         |
| <i>Spodoptera ornithogalli</i>  | Caterpillar     | 12d: larval mass gain, attached leaves   | 13    | [3]         |
| <i>Trichoplusia ni</i>          | Caterpillar     | 12e: larval mass gain, detached leaves   | 13    | [3]         |
| <i>Trichoplusia ni</i>          | Caterpillar     | 12f: larval mass gain, attached leaves   | 13    | [3]         |
| <i>Schistocerca americana</i>   | Grasshopper     | 18a: area of leaf eaten                  | 15    | [4]         |
| <i>Procambarus acutus</i>       | Crayfish        | 22a: plant mass eaten                    | 20    | [5]         |
| <i>Procambarus spiculifer</i>   | Crayfish        | 22b: plant mass eaten                    | 20    | [5]         |

|                                 |                    |                                        |    |      |
|---------------------------------|--------------------|----------------------------------------|----|------|
| <i>Larinus latus</i>            | Seed weevil        | 23b: % flower heads attacked           | 11 | [6]  |
| <i>Tephritis postica</i>        | Seed fly           | 23c: % flower heads attacked           | 11 | [6]  |
| <i>Terellia fuscicornis</i>     | Seed fly           | 23d: % flower heads attacked           | 11 | [6]  |
| <i>Puccinia psidii</i> MISOL    | Fungal pathogen    | 24a: pustule density                   | 8  | [7]  |
| <i>Puccinia psidii</i> PISOL    | Fungal pathogen    | 24b: pustule density                   | 8  | [7]  |
| <i>Oxyops vitiosa</i>           | Foliar weevil      | 25a: leaf area eaten by larvae         | 25 | [8]  |
| <i>Oxyops vitiosa</i>           | Foliar weevil      | 25b: leaf area eaten by adults         | 30 | [8]  |
| <i>Oxyops vitiosa</i>           | Foliar weevil      | 25c: eggs laid                         | 30 | [8]  |
| <i>Galerucella pusilla</i>      | Leaf beetle        | 26a: eggs laid                         | 13 | [9]  |
| <i>Galerucella calmariensis</i> | Leaf beetle        | 26b: eggs laid                         | 13 | [9]  |
| <i>Bagous hydrillae</i>         | Stem-boring weevil | 27a: eggs laid                         | 18 | [10] |
| <i>Cydia succedana</i>          | Pod moth           | 28a: eggs laid                         | 10 | [11] |
| <i>Deuterocampta quadrijuga</i> | Foliar beetle      | 31a: foliar damage rating              | 7  | [12] |
| <i>Dictyla</i> sp.              | Tingid bug         | 31c: foliar damage rating              | 7  | [12] |
| <i>Haplothrips heliotropica</i> | Thrips             | 31d: foliar damage rating              | 7  | [12] |
| <i>Longitarsus</i> sp.          | Flea-beetle        | 31e: foliar damage rating              | 7  | [12] |
| <i>Phytophthora ramorum</i>     | Oomycete pathogen  | 32a: disease severity, winter no wound | 41 | [13] |

|                             |                   |                                        |    |      |
|-----------------------------|-------------------|----------------------------------------|----|------|
| <i>Phytophthora ramorum</i> | Oomycete pathogen | 32b: disease severity, summer no wound | 64 | [13] |
| <i>Phytophthora ramorum</i> | Oomycete pathogen | 32c: disease severity, summer wound    | 64 | [13] |
| <i>Phytophthora ramorum</i> | Oomycete pathogen | 32d: leaf infection, winter no wound   | 42 | [13] |
| <i>Phytophthora ramorum</i> | Oomycete pathogen | 32e: leaf infection, summer no wound   | 65 | [13] |
| <i>Phytophthora ramorum</i> | Oomycete pathogen | 32f: leaf infection, summer wound      | 65 | [13] |
| <i>Phytophthora ramorum</i> | Oomycete pathogen | 32g: susceptibility rating             | 65 | [13] |
| <i>Phytophthora ramorum</i> | Oomycete pathogen | 32h: sporangium production             | 28 | [13] |
| <i>Phytophthora ramorum</i> | Oomycete pathogen | 32i: lesion area                       | 28 | [13] |
| <i>Phytophthora ramorum</i> | Oomycete pathogen | 34a: lesion length                     | 63 | [14] |
| <i>Drosophila suzukii</i>   | Fruit fly         | 35a: adult female mass                 | 7  | [15] |
| <i>Drosophila suzukii</i>   | Fruit fly         | 35b: fly development time              | 7  | [15] |
| <i>Drosophila suzukii</i>   | Fruit fly         | 35c: flight bioassay                   | 7  | [15] |
| <i>Drosophila suzukii</i>   | Fruit fly         | 35d: oviposition per fruit             | 7  | [15] |
| <i>Drosophila suzukii</i>   | Fruit fly         | 35e: percent fly emergence             | 7  | [15] |
| <i>Drosophila suzukii</i>   | Fruit fly         | 35f: oviposition frequency             | 7  | [15] |
| <i>Drosophila suzukii</i>   | Fruit fly         | 35g: Host Potential Index              | 13 | [15] |

1. Kleczewski NM, Flory SL, Clay K. Variation in pathogenicity and host range of *Bipolaris* sp. causing leaf blight disease on the invasive grass *Microstegium vimineum*. *Weed Sci.* 2012;60(3):486-93.
2. Tabashnik BE. Host range evolution - the shift from native legume hosts to alfalfa by the butterfly, *Colias philodice-eriphyle*. *Evolution.* 1983;37(1):150-62.
3. Dussourd DE, Denno RF. Host-range of generalist caterpillars - trenching permits feeding on plants with secretory canals. *Ecology.* 1994;75(1):69-78.
4. Jogesh T, Carpenter D, Cappuccino N. Herbivory on invasive exotic plants and their non-invasive relatives. *Biol Invasions.* 2008;10(6):797-804.
5. Parker JD, Hay ME. Biotic resistance to plant invasions? Native herbivores prefer non-native plants. *Ecol Lett.* 2005;8(9):959-67.
6. Briese DT, Sheppard AW, Reifenberg JM. Open-field host-specificity testing for potential biological-control agents of *Onopordum* thistles. *Biol Control.* 1995;5(2):158-66.
7. Rayachhetry MB, Van TK, Center TD, Elliott ML. Host range of *Puccinia psidii*, a potential biological control agent of *Melaleuca quinquenervia* in Florida. *Biol Control.* 2001;22(1):38-45.
8. Balciunas JK, Burrows DW, Purcell MF. Field and laboratory host ranges of the Australian weevil, *Ocyops vitiosa* (Coleoptera, Curculionidae), a potential biological-control agent for the paperbark tree, *Melaleuca quinquenervia*. *Biol Control.* 1994;4(4):351-60.
9. Blossey B, Schroeder D, Hight SD, Malecki RA. Host-specificity and environmental-impact of 2 leaf-beetles (*Galerucella californiensis* and *G. pusilla*) for biological control of purple-loosestrife (*Lythrum salicaria*). *Weed Sci.* 1994;42(1):134-40.
10. Balciunas JK, Burrows DW. Distribution, abundance and field host-range of *Hydrellia balciunasi* Bock (Diptera: Ephydriidae) a biological control agent for the aquatic weed *Hydrilla verticillata* (Lf) Royle. *Aust J Entomol.* 1996;35:125-30.
11. Withers T, Hill R, Paynter Q, Fowler S, Gourlay H. Post-release investigations into the field host range of the gorse pod moth *Cydia succedana* Denis & Schiffermüller (Lepidoptera: Tortricidae) in New Zealand. *N Z Entomol.* 2008;31(1):67-76.
12. Briese DT, Zapater M, Andorno A, Perez-Camargo G. A two-phase open-field test to evaluate the host-specificity of candidate biological control agents for *Heliotropium amplexicaule*. *Biol Control.* 2002;25(3):259-72.
13. Ireland KB, Huberli D, Dell B, Smith IW, Rizzo DM, Hardy G. Potential susceptibility of Australian flora to a NA2 isolate of *Phytophthora ramorum* and pathogen sporulation potential. *For Pathol.* 2012;42(4):305-20.
14. Ireland KB, Huberli D, Dell B, Smith IW, Rizzo DM, Hardy G. Potential susceptibility of Australian native plant species to branch dieback and bole canker diseases caused by *Phytophthora ramorum*. *Plant Pathol.* 2012;61(2):234-46.
15. Bellamy DE, Sisterson MS, Walse SS. Quantifying host potentials: Indexing postharvest fresh fruits for spotted wing *Drosophila*, *Drosophila suzukii*. *Plos One.* 2013;8(4).
