# Supplementary material for: The Impact of Plant Enemies Shows a Phylogenetic Signal
Source: PubMed Central journal article supplement (PMC4404352; doi:10.1371/journal.pone.0123758), 2015-04-20
Supplement: pone.0123758.s004.pdf [file pone.0123758.s004.pdf]

**Table S2. Regression outputs from linear regression for each of the study units described in Table S1.** Regressions take the form of  $RI = b_0 + b_1 \log_{10}(PD + 1)$ . Phylogenetic distance (PD) is the estimated time of independent evolution from the most affected species in the study unit (in Ma, millions of years);  $b_0$  is the slope and  $b_1$  is the intercept. P-values in bold indicate slopes significantly different from zero (alpha = 0.05). Confidence intervals (95%) are given for the slope of each model. The type of interaction and which partner was impacted are used for meta-analysis grouping in Table 1 and Figure 1 in the main text.

| Unit       | Intercept | SE int | Slope   | SE slope | t-value  | P-value         | df | adjR <sup>2</sup> | CI025   | CI975   | Interaction | Impacted |
|------------|-----------|--------|---------|----------|----------|-----------------|----|-------------------|---------|---------|-------------|----------|
| <b>24a</b> | 1.0000    | 0.1835 | -0.3748 | 0.0984   | -3.8108  | <b>0.00885</b>  | 6  | 0.6589            | -0.6155 | -0.1341 | disease     | plant    |
| <b>24b</b> | 1.0119    | 0.2132 | -0.3561 | 0.1166   | -3.0550  | <b>0.02236</b>  | 6  | 0.5435            | -0.6414 | -0.0709 | disease     | plant    |
| <b>32a</b> | 0.9945    | 0.0744 | -0.3817 | 0.0307   | -12.4214 | <b>3.93E-15</b> | 39 | 0.7931            | -0.4439 | -0.3196 | disease     | plant    |
| <b>32b</b> | 1.0573    | 0.1793 | -0.3758 | 0.0742   | -5.0656  | <b>3.92E-06</b> | 62 | 0.2813            | -0.5241 | -0.2275 | disease     | plant    |
| <b>32c</b> | 0.9359    | 0.1723 | -0.3322 | 0.0777   | -4.2761  | <b>0.00006</b>  | 62 | 0.2153            | -0.4875 | -0.1769 | disease     | plant    |
| <b>32d</b> | 0.7726    | 0.2795 | -0.0095 | 0.1195   | -0.0795  | 0.93699         | 40 | -0.0248           | -0.2510 | 0.2320  | disease     | plant    |
| <b>32e</b> | 1.2158    | 0.2809 | -0.2016 | 0.1214   | -1.6615  | 0.10157         | 63 | 0.0268            | -0.4442 | 0.0409  | disease     | plant    |
| <b>32f</b> | 1.0412    | 0.2022 | -0.0651 | 0.0875   | -0.7440  | 0.45965         | 63 | -0.0070           | -0.2400 | 0.1098  | disease     | plant    |
| <b>32g</b> | 0.8616    | 0.1616 | -0.2162 | 0.0744   | -2.9068  | <b>0.00503</b>  | 63 | 0.1043            | -0.3649 | -0.0676 | disease     | plant    |
| <b>32i</b> | 0.9909    | 0.0596 | -0.3997 | 0.0252   | -15.8305 | <b>3.93E-15</b> | 26 | 0.9024            | -0.4516 | -0.3478 | disease     | plant    |
| <b>34a</b> | 0.9620    | 0.1127 | -0.3637 | 0.0472   | -7.7020  | <b>3.92E-06</b> | 61 | 0.4847            | -0.4581 | -0.2693 | disease     | plant    |

|            |        |        |         |        |          |                 |    |        |         |         |           |                   |
|------------|--------|--------|---------|--------|----------|-----------------|----|--------|---------|---------|-----------|-------------------|
| <b>4a</b>  | 1.2513 | 0.3031 | -0.4508 | 0.1373 | -3.2824  | <b>0.00730</b>  | 11 | 0.4489 | -0.7531 | -0.1485 | disease   | plant             |
| <b>4b</b>  | 1.1304 | 0.3180 | -0.4117 | 0.1441 | -2.8575  | <b>0.01558</b>  | 11 | 0.3739 | -0.7289 | -0.0946 | disease   | plant             |
| <b>4c</b>  | 0.9595 | 0.0415 | -0.3955 | 0.0188 | -21.0900 | <b>3.93E-15</b> | 11 | 0.9737 | -0.4368 | -0.3542 | disease   | plant             |
| <b>4d</b>  | 0.9595 | 0.0415 | -0.3955 | 0.0188 | -21.0900 | <b>3.92E-06</b> | 11 | 0.9737 | -0.4368 | -0.3542 | disease   | plant             |
| <b>18a</b> | 0.9271 | 0.2392 | -0.1648 | 0.1087 | -1.5160  | 0.15344         | 13 | 0.0849 | -0.3996 | 0.0700  | herbivory | plant             |
| <b>22a</b> | 0.8737 | 0.3156 | -0.1704 | 0.1361 | -1.2516  | 0.22674         | 18 | 0.0290 | -0.4564 | 0.1156  | herbivory | plant             |
| <b>22b</b> | 0.8396 | 0.1732 | -0.1809 | 0.0758 | -2.3871  | <b>0.02816</b>  | 18 | 0.1983 | -0.3402 | -0.0217 | herbivory | plant             |
| <b>23b</b> | 1.0383 | 0.1732 | -0.4981 | 0.1162 | -4.2881  | <b>0.00202</b>  | 9  | 0.6349 | -0.7609 | -0.2353 | herbivory | plant             |
| <b>23c</b> | 0.5241 | 0.2332 | -0.2683 | 0.1564 | -1.7160  | 0.12030         | 9  | 0.1628 | -0.6221 | 0.0854  | herbivory | plant             |
| <b>23d</b> | 1.1577 | 0.2152 | -0.5863 | 0.1427 | -4.1086  | <b>0.00264</b>  | 9  | 0.6136 | -0.9091 | -0.2635 | herbivory | plant             |
| <b>25a</b> | 0.8917 | 0.1268 | -0.4078 | 0.0642 | -6.3549  | <b>1.75E-06</b> | 23 | 0.6214 | -0.5405 | -0.2750 | herbivory | plant             |
| <b>25b</b> | 0.9509 | 0.2452 | -0.3867 | 0.1231 | -3.1422  | <b>0.00393</b>  | 28 | 0.2343 | -0.6388 | -0.1346 | herbivory | plant             |
| <b>31a</b> | 1.0673 | 0.3282 | -0.4497 | 0.1721 | -2.6135  | <b>0.04746</b>  | 5  | 0.4928 | -0.8920 | -0.0074 | herbivory | plant             |
| <b>31c</b> | 1.0415 | 0.2490 | -0.4516 | 0.1306 | -3.4592  | <b>0.01805</b>  | 5  | 0.6464 | -0.7872 | -0.1160 | herbivory | plant             |
| <b>31d</b> | 0.9957 | 0.1194 | -0.4551 | 0.0626 | -7.2710  | <b>0.00076</b>  | 5  | 0.8963 | -0.6159 | -0.2942 | herbivory | plant             |
| <b>31e</b> | 1.0783 | 0.2123 | -0.4489 | 0.1113 | -4.0324  | <b>0.00999</b>  | 5  | 0.7178 | -0.7350 | -0.1627 | herbivory | plant             |
| <b>32h</b> | 0.9965 | 0.1140 | -0.4042 | 0.0483 | -8.3759  | <b>7.39E-09</b> | 26 | 0.7192 | -0.5034 | -0.3050 | disease   | enemy development |

|            |        |        |         |        |         |                 |    |         |         |         |           |                   |
|------------|--------|--------|---------|--------|---------|-----------------|----|---------|---------|---------|-----------|-------------------|
| <b>12c</b> | 0.9728 | 0.1567 | -0.1663 | 0.0689 | -2.4136 | <b>0.03439</b>  | 11 | 0.2868  | -0.3179 | -0.0146 | herbivory | enemy development |
| <b>12d</b> | 0.7731 | 0.3524 | -0.1135 | 0.1611 | -0.7046 | 0.49573         | 11 | -0.0438 | -0.4680 | 0.2410  | herbivory | enemy development |
| <b>12e</b> | 0.9983 | 0.1783 | -0.2369 | 0.0784 | -3.0205 | <b>0.01164</b>  | 11 | 0.4037  | -0.4095 | -0.0643 | herbivory | enemy development |
| <b>12f</b> | 0.9990 | 0.1754 | -0.2655 | 0.0771 | -3.4413 | <b>0.00551</b>  | 11 | 0.4747  | -0.4353 | -0.0957 | herbivory | enemy development |
| <b>35a</b> | 0.9983 | 0.0697 | -0.0781 | 0.0361 | -2.1637 | 0.08279         | 5  | 0.3803  | -0.1710 | 0.0147  | herbivory | enemy development |
| <b>35b</b> | 0.9983 | 0.0368 | -0.0629 | 0.0172 | -3.6542 | <b>0.01468</b>  | 5  | 0.6731  | -0.1071 | -0.0187 | herbivory | enemy development |
| <b>35e</b> | 1.0514 | 0.3257 | -0.2953 | 0.1653 | -1.7864 | 0.13408         | 5  | 0.2675  | -0.7201 | 0.1296  | herbivory | enemy development |
| <b>9a</b>  | 0.9888 | 0.0542 | -0.0995 | 0.0495 | -2.0110 | 0.11467         | 4  | 0.3784  | -0.2369 | 0.0379  | herbivory | enemy development |
| <b>9b</b>  | 0.9016 | 0.0718 | -0.0300 | 0.0656 | -0.4566 | 0.67167         | 4  | -0.1881 | -0.2121 | 0.1522  | herbivory | enemy development |
| <b>12a</b> | 1.2038 | 0.3521 | -0.3916 | 0.1685 | -2.3238 | <b>0.04030</b>  | 11 | 0.2683  | -0.7624 | -0.0207 | herbivory | enemy behavior    |
| <b>12b</b> | 1.0660 | 0.2286 | -0.4119 | 0.1094 | -3.7655 | <b>0.00312</b>  | 11 | 0.5234  | -0.6527 | -0.1712 | herbivory | enemy behavior    |
| <b>25c</b> | 0.8061 | 0.1127 | -0.3768 | 0.0566 | -6.6602 | <b>3.15E-07</b> | 28 | 0.5992  | -0.4926 | -0.2609 | herbivory | enemy behavior    |
| <b>26a</b> | 0.7867 | 0.1166 | -0.4439 | 0.0709 | -6.2567 | <b>0.00004</b>  | 12 | 0.7458  | -0.5985 | -0.2893 | herbivory | enemy behavior    |
| <b>26b</b> | 0.8379 | 0.1148 | -0.4817 | 0.0710 | -6.7813 | <b>0.00003</b>  | 11 | 0.7894  | -0.6381 | -0.3254 | herbivory | enemy behavior    |
| <b>27a</b> | 1.1011 | 0.1785 | -0.4031 | 0.0829 | -4.8620 | <b>0.00017</b>  | 16 | 0.5711  | -0.5788 | -0.2273 | herbivory | enemy behavior    |
| <b>28a</b> | 1.0459 | 0.1185 | -0.4596 | 0.0838 | -5.4824 | <b>0.01193</b>  | 3  | 0.8790  | -0.7264 | -0.1928 | herbivory | enemy behavior    |
| <b>35c</b> | 1.0231 | 0.0603 | -0.0879 | 0.0312 | -2.8125 | <b>0.03743</b>  | 5  | 0.5353  | -0.1682 | -0.0076 | herbivory | enemy behavior    |

|            |        |        |         |        |         |                |    |        |         |         |           |                |
|------------|--------|--------|---------|--------|---------|----------------|----|--------|---------|---------|-----------|----------------|
| <b>35d</b> | 0.9973 | 0.0974 | -0.4063 | 0.0494 | -8.2173 | <b>0.00043</b> | 5  | 0.9173 | -0.5335 | -0.2792 | herbivory | enemy behavior |
| <b>35f</b> | 0.9560 | 0.3470 | -0.2026 | 0.1761 | -1.1507 | 0.30189        | 5  | 0.0512 | -0.6554 | 0.2501  | herbivory | enemy behavior |
| <b>35g</b> | 1.0926 | 0.2173 | -0.1799 | 0.1085 | -1.6589 | 0.12535        | 11 | 0.1274 | -0.4187 | 0.0588  | herbivory | enemy behavior |
